# Supplementary material for: Investigation of chain-length selection by the tenellin iterative highly-reducing polyketide synthase
Source: Royal Society of Chemistry journal article supplement (doi:10.1039/d3ra08463a), 2024-01-01
Supplement: d3ra08463a1.pdf [file d3ra08463a1.pdf]

# Investigation of Chain-Length Selection by the Tenellin Iterative Highly-Reducing Polyketide Synthase

Katharina Schmidt and Russell J. Cox

BMWZ and Institute for Organic Chemistry

Leibniz Universität Hannover

Schneiderberg 38

30167 Hannover, Germany

## Electronic Supplementary Information

### Content

|       |                                                       |    |
|-------|-------------------------------------------------------|----|
| 1     | Methods .....                                         | 3  |
| 1.1   | Cloning Procedure, Vectors and Oligonucleotides ..... | 3  |
| 1.2   | Strains and Cultivation.....                          | 5  |
| 1.2.1 | Growth and Maintenance.....                           | 7  |
| 1.2.2 | Transformations .....                                 | 7  |
| 1.3   | Analytical LCMS .....                                 | 7  |
| 2     | Results .....                                         | 8  |
| 2.1   | Protein Structures.....                               | 8  |
| 2.1.1 | Comparison of TENS model and LOVB Structure.....      | 8  |
| 2.1.2 | Protein Models of TENS, DMBS, MILS, and vFAS.....     | 9  |
| 2.2   | Spectroscopic Data for Identified Compounds.....      | 11 |
| 2.2.1 | Detailed Analysis of Compound 10.....                 | 12 |
| 2.3   | Overview of all Generated Transformants .....         | 16 |
| 3     | Multiple Alignment.....                               | 18 |
| 4     | References.....                                       | 19 |

## 1 Methods

### 1.1 Cloning Procedure, Vectors and Oligonucleotides

The strategy for vector construction (Figure S1) was based on yeast homologous recombination. The enzymes (EcoRI, FseI) used for vector digestion within the *tenS* gene were purchased from New England Biolabs (Beverly, MA, USA) and used according to the manufacturer's instructions with appropriate supplied buffers.

The proofreading Q5<sup>®</sup> 2x Master Mix (New England Biolabs) was used to obtain DNA fragments needed for further cloning procedure (F1-F3) with the pEYA-*tenS* as a template. The information provided by the manufacturer served as a template. Mutations/swap sequences were introduced by synthetic fragments (Twist Bioscience) to rebuild pEYA-*tenS*\*.

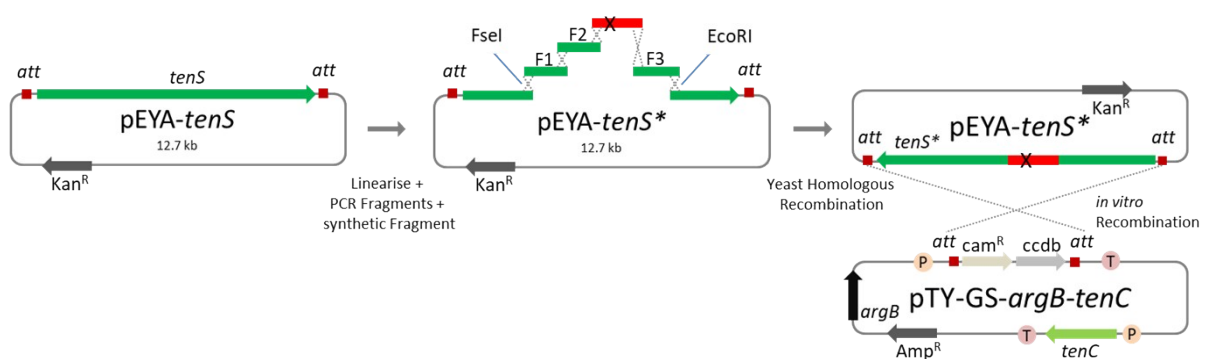

**Figure S1** Cloning strategy.

The transformation of *S. cerevisiae* was done using the LiOAc/SS carrier DNA/PEG protocol developed by Gietz and Woods.<sup>1,2</sup> Therefore, fresh yeast cells were incubated with the transformation-mix (50  $\mu$ l 2 mg/ml ssDNA, 240  $\mu$ l 50 % PEG 3350, 36  $\mu$ l 1 M LiAc, up to 5  $\mu$ g DNA (cut plasmid, fragments, equimolar)) for 42 °C for 50 min. Cells were pelleted at 11000 x g for 30 s and re-suspended with 500  $\mu$ l water. 250  $\mu$ l of the cell mixture was spread on selective SM-URA plates and incubated for 3-5 days at 30 °C. The vector DNA was then purified from yeast, transformed into *E. coli* Top 10. DNA samples were sequenced by Eurofins Genomics (Mix2Seq OVERNIGHT, Ebersberg).

Gateway LR Clonase II Enzyme mix kit (Invitrogen)<sup>3</sup> was used to transfer genes from the entry vector pEYA-*tenS*\* to the destination vector pTY-GS-*argB-tenC* (Figure S1). The manufacturer's instructions were followed. For *E. coli* Top10 transformation, the vector mixture (10  $\mu$ l) was added to 50  $\mu$ l competent cells.

Information about the used vectors in this work are summarised in Table S1.

**Table S1** Summary of used vectors.

| Name                                                              | Description                                                                                                 | Selection                                            |
|-------------------------------------------------------------------|-------------------------------------------------------------------------------------------------------------|------------------------------------------------------|
| pEYA- <i>tenS</i>                                                 | pEYA shuttle vector including <i>tenS</i> gene                                                              | Kan <sup>R</sup>                                     |
| pTY- <i>argB-tenC</i>                                             | fungal expression vector with trans-ER <i>tenC</i> gene                                                     | <i>argB</i> , <i>arb</i> <sup>R</sup> , <i>URA3</i>  |
| pTY- <i>argB-tenS-tenC</i>                                        | pTY- <i>argB-tenC</i> including <i>tenS</i> gene                                                            | <i>argB</i> , <i>arb</i> <sup>R</sup> , <i>URA3</i>  |
| pEYA- <i>tenS</i> * <i>sbh</i> :DmbS                              | T2395 to V2409 swap to DmbS sequence                                                                        | Kan <sup>R</sup>                                     |
| pEYA- <i>tenS</i> * <i>sbh</i> :MilS                              | T2395 to V2409 swap to MilS sequence                                                                        | Kan <sup>R</sup>                                     |
| pEYA- <i>tenS</i> * 2400N, L2401R, 2404M, V2406A                  | Mutations 2400N, L2401R, 2404M, V2406A                                                                      | Kan <sup>R</sup>                                     |
| pTY- <i>argB-tenS</i> *- <i>tenC</i> <i>sbh</i> :DmbS             | fungal expression vector with trans-ER <i>tenC</i> gene, T2395 to V2409 swap to DmbS sequence               | <i>argB</i> , <i>arb</i> <sup>R</sup> , <i>URA3</i>  |
| pTY- <i>argB-tenS</i> *- <i>tenC</i> <i>sbh</i> :MilS             | fungal expression vector with trans-ER <i>tenC</i> gene, T2395 to V2409 swap to MilS sequence               | <i>argB</i> , <i>arb</i> <sup>R</sup> , <i>URA3</i>  |
| pTY- <i>argB-tenS</i> *- <i>tenC</i> 2400N, L2401R, 2404M, V2406A | fungal expression vector with trans-ER <i>tenC</i> gene, mutations 2400N, L2401R, 2404M, V2406A             | <i>argB</i> , <i>Carb</i> <sup>R</sup> , <i>URA3</i> |
| pEYA- <i>tenS</i> * AlaN                                          | pEYA- <i>tenS</i> with alanine mutations at position N (N between D2394 to S2410)                           | Kan <sup>R</sup>                                     |
| pTY- <i>argB-tenS</i> *AlaN- <i>tenC</i>                          | pTY- <i>argB-tenC</i> including <i>tenS</i> gene alanine mutations at position N (N between D2394 to S2410) | <i>argB</i> , <i>Carb</i> <sup>R</sup> , <i>URA3</i> |

Information about the used oligonucleotides in this work are summarised in Table S2. They were synthesized by Sigma Aldrich and supplied lyophilised. They were dissolved according to the manufacturer's instructions.

**Table S2** Summary of used oligonucleotides.

| Description                             | Name              | Sequence                                                                                                                                                                                                                                                                                                                               |
|-----------------------------------------|-------------------|----------------------------------------------------------------------------------------------------------------------------------------------------------------------------------------------------------------------------------------------------------------------------------------------------------------------------------------|
| Fragment 1                              | A1                | CGCATTCTCCACGGCTATTGGAAC                                                                                                                                                                                                                                                                                                               |
|                                         | A2                | CCTGCTGATCTTCTGAACGTCG                                                                                                                                                                                                                                                                                                                 |
| Fragment 2                              | A3                | GATGCCAGCTCCAAAAGGCC                                                                                                                                                                                                                                                                                                                   |
|                                         | A4                | CTGTATTATTAGAATGGCAGCGCTCGAGCTTAGCAAGACAAAAAGTC                                                                                                                                                                                                                                                                                        |
| Fragment 3                              | A5                | CGGCTCCCACAACATCATAATGG                                                                                                                                                                                                                                                                                                                |
|                                         | A6                | GCTTTGGACGATGCGGCGCGG                                                                                                                                                                                                                                                                                                                  |
| Fragment 2/3 for alanine scan           | A4_alascan        | GTCGTCAACCAAGCGGGCAAC                                                                                                                                                                                                                                                                                                                  |
|                                         | A5_alascan        | GTCGTCAACCAAGCGGGCAAC                                                                                                                                                                                                                                                                                                                  |
| synthetic fragments including mutations | <i>sbh</i> = DmbS | GCTCGAGCGCTGCCATTCTGAATAATACAGGCCAGTCAAACCTACCACTGCGCAAATCTCTA<br>CATGGACAGCCTGGTACCAATCGGGCGCTCGAGAGGACTCGCAGCTTCCATTATCCATATC<br>GGTCATGTCTGCGACACGGGATACGTTGCCCGCTTGGTTGACGACACCAAGGTGCAGATG<br>AACCTAGGTACCATGCGAGCCATGAGTGTCTCTGAGACGGATGTGCATCATGCCTTTGCT<br>GAGGCGGTCCGCGGGGGCAGCCAGACAGCCGGAGCGGCTCCACAACATCATAATGG<br>GTATTGA |

|                                                              |            |                                                                                                                                                                                                                                                                                                                                       |
|--------------------------------------------------------------|------------|---------------------------------------------------------------------------------------------------------------------------------------------------------------------------------------------------------------------------------------------------------------------------------------------------------------------------------------|
| synthetic fragments including mutations                      | sbh = MilS | GCTCGAGCGCTGCCATTGCGAATAATACAGGCCAGTCAAACCTACCCTGCGCAAATCTCTA<br>CATGGACAGCCTGGTCCACCAATCGGCGCTCGAGAGGACTCGCAGCTTCCATTATCCATATC<br>GGTCATGTCTGCGACACGGGATACGTTGCCCGCTTGGTTGACGACACCAAGGTGCAGATG<br>AACCGAGTACCATGCGAGCCATGAGTGTCTCTGAGACGGATGTGCATCATGCCTTTGCT<br>GAGGCGTCCCGGGGGGCGAGCCAGACAGCCGGAGCGGCTCCACAACATCATAATGG<br>GTATTGA |
| synthetic fragments including alanine-swaps for alanine scan | Ala1       | ACGGGATACGTTGCCCGCTTGGTTGACGACGCCAAGGTGCAGATGAGCCTAGGTACCAC<br>GCGAGTCATGAGTGTCTCTGAGACGGATGTGCATCATGCCTTTGCT                                                                                                                                                                                                                         |
|                                                              | Ala2       | ACGGGATACGTTGCCCGCTTGGTTGACGACACCCGCGGTGCAGATGAGCCTAGGTACCAC<br>GCGAGTCATGAGTGTCTCTGAGACGGATGTGCATCATGCCTTTGCT                                                                                                                                                                                                                        |
|                                                              | Ala3       | ACGGGATACGTTGCCCGCTTGGTTGACGACACCAAGGCGCAGATGAGCCTAGGTACCAC<br>GCGAGTCATGAGTGTCTCTGAGACGGATGTGCATCATGCCTTTGCT                                                                                                                                                                                                                         |
|                                                              | Ala4       | ACGGGATACGTTGCCCGCTTGGTTGACGACACCAAGGTGCGATGAGCCTAGGTACCAC<br>GCGAGTCATGAGTGTCTCTGAGACGGATGTGCATCATGCCTTTGCT                                                                                                                                                                                                                          |
|                                                              | Ala5       | ACGGGATACGTTGCCCGCTTGGTTGACGACACCAAGGTGCGAGCGCAGCCTAGGTACCAC<br>GCGAGTCATGAGTGTCTCTGAGACGGATGTGCATCATGCCTTTGCT                                                                                                                                                                                                                        |
|                                                              | Ala6       | ACGGGATACGTTGCCCGCTTGGTTGACGACACCAAGGTGCAGATGCGCCTAGGTACCACG<br>CGAGTCATGAGTGTCTCTGAGACGGATGTGCATCATGCCTTTGCT                                                                                                                                                                                                                         |
|                                                              | Ala7       | ACGGGATACGTTGCCCGCTTGGTTGACGACACCAAGGTGCAGATGAGCGCAGGTACCAC<br>GCGAGTCATGAGTGTCTCTGAGACGGATGTGCATCATGCCTTTGCT                                                                                                                                                                                                                         |
|                                                              | Ala8       | ACGGGATACGTTGCCCGCTTGGTTGACGACACCAAGGTGCAGATGAGCCTAGGTACCACG<br>CGAGTCATGAGTGTCTCTGAGACGGATGTGCATCATGCCTTTGCT                                                                                                                                                                                                                         |
|                                                              | Ala9       | ACGGGATACGTTGCCCGCTTGGTTGACGACACCAAGGTGCAGATGAGCCTAGGTGCCAC<br>GCGAGTCATGAGTGTCTCTGAGACGGATGTGCATCATGCCTTTGCT                                                                                                                                                                                                                         |
|                                                              | Ala10      | ACGGGATACGTTGCCCGCTTGGTTGACGACACCAAGGTGCAGATGAGCCTAGGTACCACG<br>GCGAGTCATGAGTGTCTCTGAGACGGATGTGCATCATGCCTTTGCT                                                                                                                                                                                                                        |
|                                                              | Ala11      | ACGGGATACGTTGCCCGCTTGGTTGACGACACCAAGGTGCAGATGAGCCTAGGTACCAC<br>GCGAGTCATGAGTGTCTCTGAGACGGATGTGCATCATGCCTTTGCT                                                                                                                                                                                                                         |
|                                                              | Ala12      | ACGGGATACGTTGCCCGCTTGGTTGACGACACCAAGGTGCAGATGAGCCTAGGTACCAC<br>GCGAGCCATGAGTGTCTCTGAGACGGATGTGCATCATGCCTTTGCT                                                                                                                                                                                                                         |
|                                                              | Ala13      | ACGGGATACGTTGCCCGCTTGGTTGACGACACCAAGGTGCAGATGAGCCTAGGTACCAC<br>GCGAGTCGCGAGTGTCTCTGAGACGGATGTGCATCATGCCTTTGCT                                                                                                                                                                                                                         |
|                                                              | Ala14      | ACGGGATACGTTGCCCGCTTGGTTGACGACACCAAGGTGCAGATGAGCCTAGGTACCAC<br>GCGAGTCATGGCTGTCTCTGAGACGGATGTGCATCATGCCTTTGCT                                                                                                                                                                                                                         |
|                                                              | Ala15      | ACGGGATACGTTGCCCGCTTGGTTGACGACACCAAGGTGCAGATGAGCCTAGGTACCAC<br>GCGAGTCATGAGTGCCTCTGAGACGGATGTGCATCATGCCTTTGCT                                                                                                                                                                                                                         |
| primer for control and sequencing                            | KR_amp_fw  | ATGGTCTTGCCTGACAAGCTT                                                                                                                                                                                                                                                                                                                 |
|                                                              | KR_amp_rev | CATCTGATTCTCCAGGGTGCTAAA                                                                                                                                                                                                                                                                                                              |
|                                                              | SQ_KR      | GCAAGGTACGGAGCATCTGGACTCG                                                                                                                                                                                                                                                                                                             |

## 1.2 Strains and Cultivation

Information about the used strains in this work are summarised in Table S3.

**Table S3** Summary of used strains.

| Organism             | Strain                                  | Genotype                                                                                                                                                                                                                   | Reference                |
|----------------------|-----------------------------------------|----------------------------------------------------------------------------------------------------------------------------------------------------------------------------------------------------------------------------|--------------------------|
| <i>E. coli</i>       | OneShot® Top10                          | <i>F mcrA</i> Δ( <i>mrr-hsdRMS-mcrBC</i> )<br>Φ80 <i>lacZ</i> Δ <i>M15</i> Δ <i>lacX74 recA1</i><br><i>araD139</i> Δ( <i>araleu</i> )7697 <i>galU galk rpsL</i><br>( <i>StrR</i> ) <i>endA1 nupG</i>                       | Thermo Fisher Scientific |
|                      | OneShot® ccdB survival 2T1 <sup>R</sup> | <i>F mcrA</i> Δ( <i>mrr-hsdRMS-mcrBC</i> )<br>Φ80 <i>lacZ</i> Δ <i>M15</i> Δ <i>lacX74 recA1</i> <i>araD139</i><br>Δ( <i>ara-leu</i> )7697 <i>galU galk rpsL</i> ( <i>Str<sup>R</sup></i> )<br><i>endA1 nupG fhuA::IS2</i> | Thermo Fisher Scientific |
| <i>S. cerevisiae</i> | CEN.PK2                                 | <i>MATa/a ura3-52/ura3-52 trp1-289/trp1-289</i><br><i>leu2-3_112/leu2-3_112 his3D1/his3</i><br><i>D1MAL2-8C/MAL2-8C SUC2/SUC2</i>                                                                                          | Euroscarf                |
| <i>A. oryzae</i>     | NSAR1                                   | Δ <i>argB sC</i> Δ <i>adeA niaD</i>                                                                                                                                                                                        | Lazarus group, Bristol   |

All media (Table S4), buffers and solutions used in this work were prepared with Millipore water (GenPure Pro UV/UF millipore device, *Thermo Fisher Scientific*) and sterilised by autoclaving 15 min at 121 °C (Autoclave 2100 Classic, *Prestige Medical*) or sterilised by disposable syringe filters (pore size 0.2 – 0.4 µm, *Carl Roth*). The pH was adjusted with 2 M HCl or 2 M NaOH by using a FiveEasy Standard pH Meter Line (*Mettler Toledo*).

**Table S4** Media used in this work.

| <b>Media</b>   | <b>Composition [% (w/v)]</b>                                                                                                                                                                                                                |
|----------------|---------------------------------------------------------------------------------------------------------------------------------------------------------------------------------------------------------------------------------------------|
| CMP media      | 3.5 % Czapek Dox broth (Duchefa Biochemie), 2 % D(+)-Maltose monohydrate (Duchefa Biochemie), 1 % Polypeptone (Roth), 3.5 % Czapek Dox broth (Duchefa Biochemie)                                                                            |
| CZD/S agar     | 3.5 % Czapek Dox broth (Duchefa Biochemie), 18.22 % D-Sorbitol (=1 M) (Roth), 0.1 % Ammonium sulfate (Roth), 0.05 % Adenine (Roth), 0.15 % L-Methionine (Roth), 1.5 % Agar (Duchefa Biochemie)                                              |
| CZD/S softagar | 3.5 % Czapek Dox broth (Duchefa Biochemie), 18.22 % D-Sorbitol (=1 M) (Roth), 0.1 % Ammonium sulfate (Roth), 0.05 % Adenine (Roth), 0.15 % L-Methionine (Roth), 0.8 % Agar (Duchefa Biochemie)                                              |
| DPY agar       | 2 % Dextrin from potato starch (Sigma Aldrich), 1 % Polypeptone (Roth), 0.5 % Yeast extract (Duchefa Biochemie), 0.5 % Monopotassium phosphate (Roth), 0.05 % Magnesium sulfate hexahydrate (Sigma Aldrich), 2.5 % Agar (Duchefa Biochemie) |
| GN media       | 2 % D(+)-Glucose Monohydrate (Roth), 1 % Nutrient broth Nr. 2 from Oxoid (Fisher Scientific)                                                                                                                                                |
| LB agar        | 0.5 % Yeast extract (Duchefa Biochemie), 1 % Tryptone (Duchefa Biochemie), 0.5 % Sodium chloride (Roth or VWR), 1.5 % Agar (Duchefa Biochemie)                                                                                              |
| LB media       | 0.5 % Yeast extract (Duchefa Biochemie), 1 % Tryptone (Duchefa Biochemie), 0.5 % Sodium chloride (Roth or VWR)                                                                                                                              |
| SM-URA agar    | 0.17 % Yeast nitrogen base (Sigma Aldrich), 0.5 % Ammonium sulfate (Roth), 2 % D(+)-Glucose monohydrate (Roth), 0.077 % Complete supplement mixture minus Uracil (Sigma Aldrich), 2.5 % Agar (Duchefa Biochemie)                            |
| SOC media      | 0.5 % Yeast extract (Duchefa Biochemie), 2 % Tryptone (Duchefa Biochemie), 0.06 % Sodium chloride (Roth or VWR), 0.02 % Potassium chloride (Roth), 25 mM Magnesium chloride hexahydrate (Roth), 1 % D(+)-Glucose monohydrate (Roth)         |
| YPAD agar      | 1 % Yeast extract (Duchefa Biochemie), 2 % Tryptone (Duchefa Biochemie), 2 % D(+)-Glucose monohydrate (Roth), 0.03 % Adenine (Roth), 1.5 % Agar (Duchefa Biochemie)                                                                         |
| YPAD media     | 1 % Yeast extract (Duchefa Biochemie), 2 % Tryptone (Duchefa Biochemie), 2 % D(+)-Glucose monohydrate (Roth), 0.03 % Adenine (Roth)                                                                                                         |

Antibiotics (carbenicillin, kanamycin) were prepared in 1000x concentrated stock solution in distilled water in a concentration of 50 µM. Stocks were sterilized through 0.45 µm syringe filter and stored at -20 °C. Antibiotics were diluted for a final concentration of 50 µg/ml by adding them to the final media.

### 1.2.1 Growth and Maintenance

*E. coli* cells were grown on LB-agar or in liquid LB-medium with corresponding antibiotics. The cells were cultivated at 37 °C for approx. 12 h. If grown in liquid media, the culture was shaking at 200 rpm.

*S. cerevisiae* cells were grown on solid YPAD agar at 30 °C for 3 – 5 days. One single colony was used for inoculation for 10 ml liquid YPAD medium. The culture was grown overnight at 30 °C and 200 rpm. After transformation of cells with vectors containing *ura3* selection marker the cultivation took place with selective SM-URA-Agar and at 30°C for 3-5 days.

*A. oryzae* strain NSAR1 was grown on DPY-agar plates for 3-7 days at 28 °C. *A. oryzae* strain NSAR1 transformants were grown in 100 ml CMP liquid medium in 500 ml baffled shake flasks for 6 days at 28 °C and 110 rpm.

### 1.2.2 Transformations

Competent *E. coli* strains were thawed on ice after - 80 °C storage. 60 – 100 ng purified plasmid was added to 50 µl *E. coli* cells and placed on ice for 30 min, followed by a heat shock at 42 °C for 30 s and cooling on ice for 2 min. 250 µl SOC-medium was added to the cells and the mixture was incubated at 37°C and 300 rpm for 1 h. The transformed cells were spread out on LB-agar plates containing appropriate antibiotics and incubated at 37 °C overnight.

*A. oryzae* NSAR1 was grown on DPY-plates at 28 °C for 5-7 days. The mycelium was used to inoculate 50 ml GN-medium in 250 ml shake flask. The culture was incubated at 28 °C and 110 rpm for approx. 18 h. The biomass was separated from the media by filtration with a miracloth filter. Mycelia was incubated with VinoTaste® Pro (Novozymes) solution (10 mg/ml enzyme) while shaking at room temperature and 2 rpm for 3-5 hours. The protoplasts were obtained by filtration with a miracloth filter and centrifuged at 3000 x g for 5 min. The resulting pellet was re-suspended with solution 1 (100 µl per transformation, 0.8 M sodium chloride, 10 mM calcium chloride, 50 mM Tris-HCl, pH 7.5). Vector DNA was added to 100 µl protoplast suspension and incubated on ice for 2 min. Then 1 ml of solution 2 (60 % (w/v) PEG 3350, 0.8 M sodium chloride, 10 mM calcium chloride, 50 mM Tris-HCl, pH 7.5) was added to the mixture and incubated at room temperature for 20 min. After incubation 5 ml of appropriate selective softagar was added to the mixture and overlaid over prepared plates with corresponding agar. Plates were incubated at 28 °C for 4-6 days. When mycelia was visible, the transformants undergo two further selection rounds to avoid false-positive transformants. The colonies are picked from the agar, placed on fresh selection agar plates, and grown for 3-5 days. For the preparation of liquid cultures the transformants were grown on DPY agar plates for 5 days. The spores were used to inoculate 100 ml CMP liquid medium.

### 1.3 Analytical LCMS

Analytical LCMS was run to analyse the extracts from fungal cultures. The Waters LCMS system containing a Waters 2767 autosampler, Waters 2545 pump, a Phenomenex Kinetex column (2.6 µm, C18, 100 Å, 4.6 x 100 mm), a Phenomenex Security Guard precolumn (Luna, C5, 300 Å) was used with a flow rate of 1 ml/min. The equipped detectors were a diode array detector (Waters 2998) in the range 210 to 600 nm and an ELSD detector (Waters 2424) together with a mass spectrometer, Waters SQD-2 mass detector (ES<sup>+</sup> and ES<sup>-</sup>, 150 and 1000 m/z). For elution, a solvent gradient was run

for 15 min starting at 10 % acetonitrile/ 90 % HPLC grade water (0.05 % formic acid) and ramping to 90 % acetonitrile.

## 2 Results

### 2.1 Protein Structures

#### 2.1.1 Comparison of TENS model and LOVB Structure

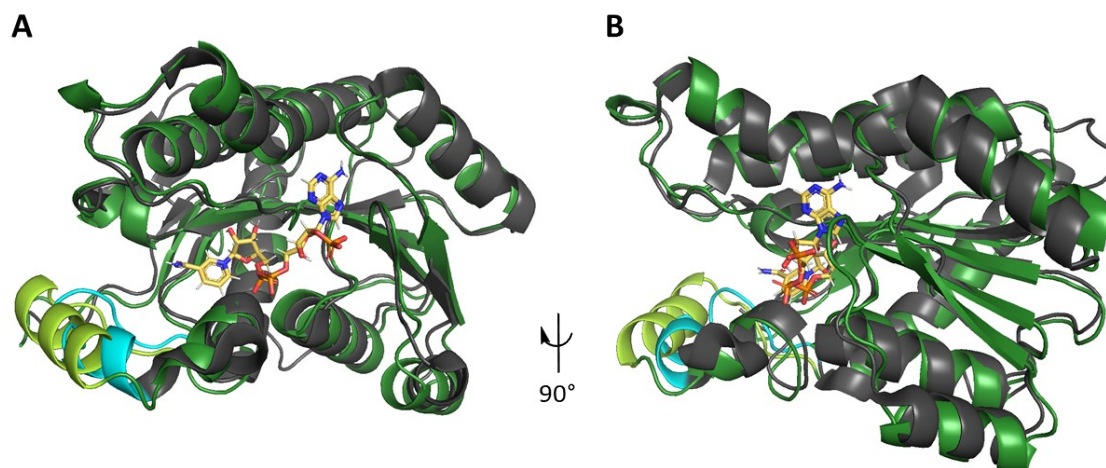

**Figure S2** Alignment of TenS KR models to LovB cryo-EM KR structure: **A**, TenS AlphaFold model vs. LovB in frontal view; **B**, TenS AlphaFold model vs. LovB in side view (grey = LovB, green = AlphaFold model, yellow = cofactor from experimental LovB data).

**Table S5** Structural comparison and resulting RMSD of LovB with threaded and AlphaFold model.

| compared area                       | 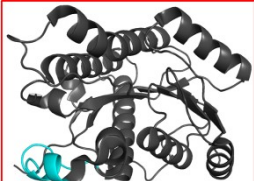 c |  e |  o |
|-------------------------------------|---------------------------------------------------------------------------------------|---------------------------------------------------------------------------------------|----------------------------------------------------------------------------------------|
|                                     | complete domain                                                                       | xcluding sbh                                                                          | nly sbh                                                                                |
| RMSD of AlphaFold model to LovB [Å] | 0.90                                                                                  | 0.87                                                                                  | 2.81                                                                                   |

### 2.1.2 Protein Models of TENS, DMBS, MILS, and vFAS

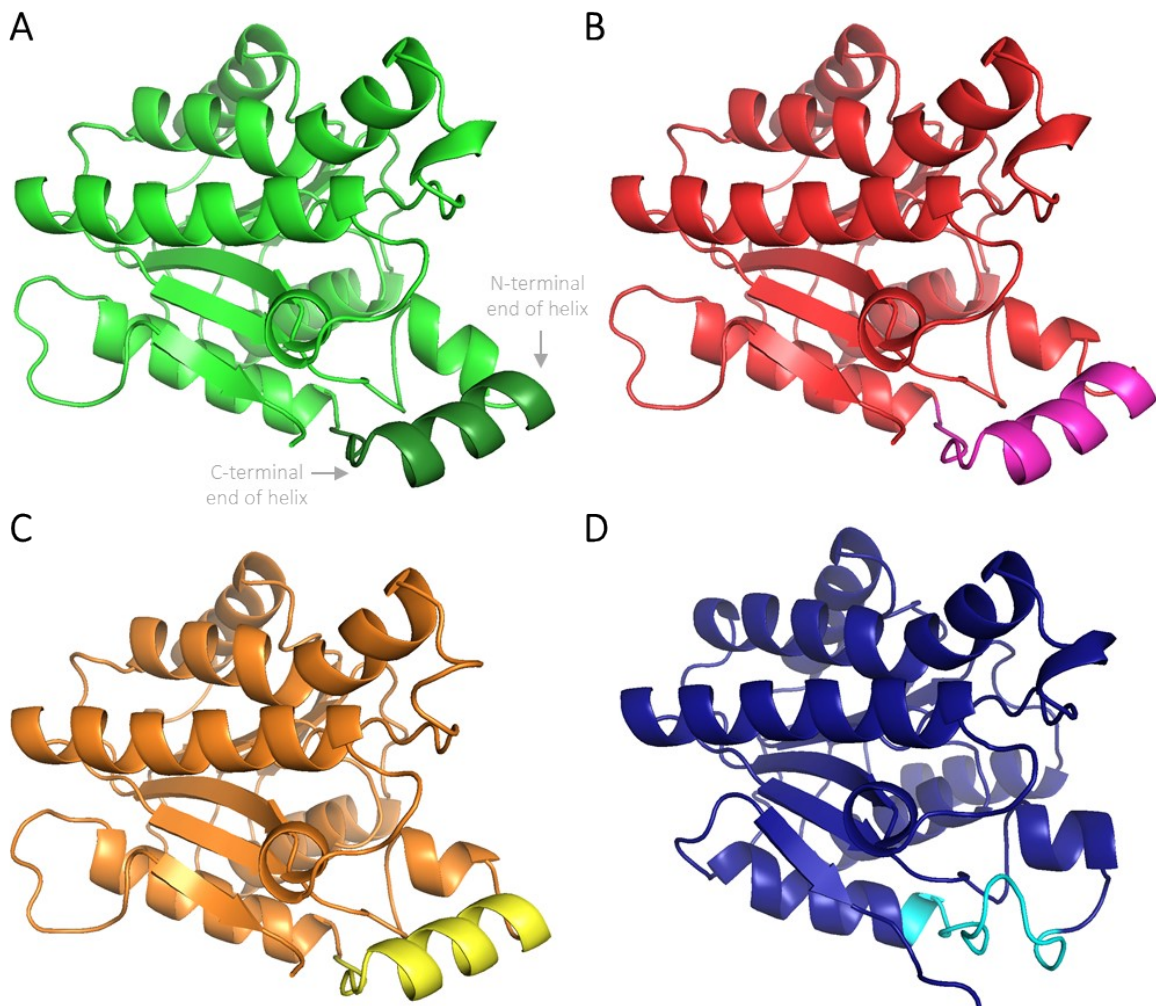

**Figure S3** Structural protein models based on AlphaFold: **A**, TenS (sbh dark green); **B**, DmbS (sbh magenta); **C**, MILS (sbh yellow); **D**, mFAS (pig, sbh cyan).



### 2.1.3 Comparison of sbh in TENS, AmphB and Tylosin KR1 structures

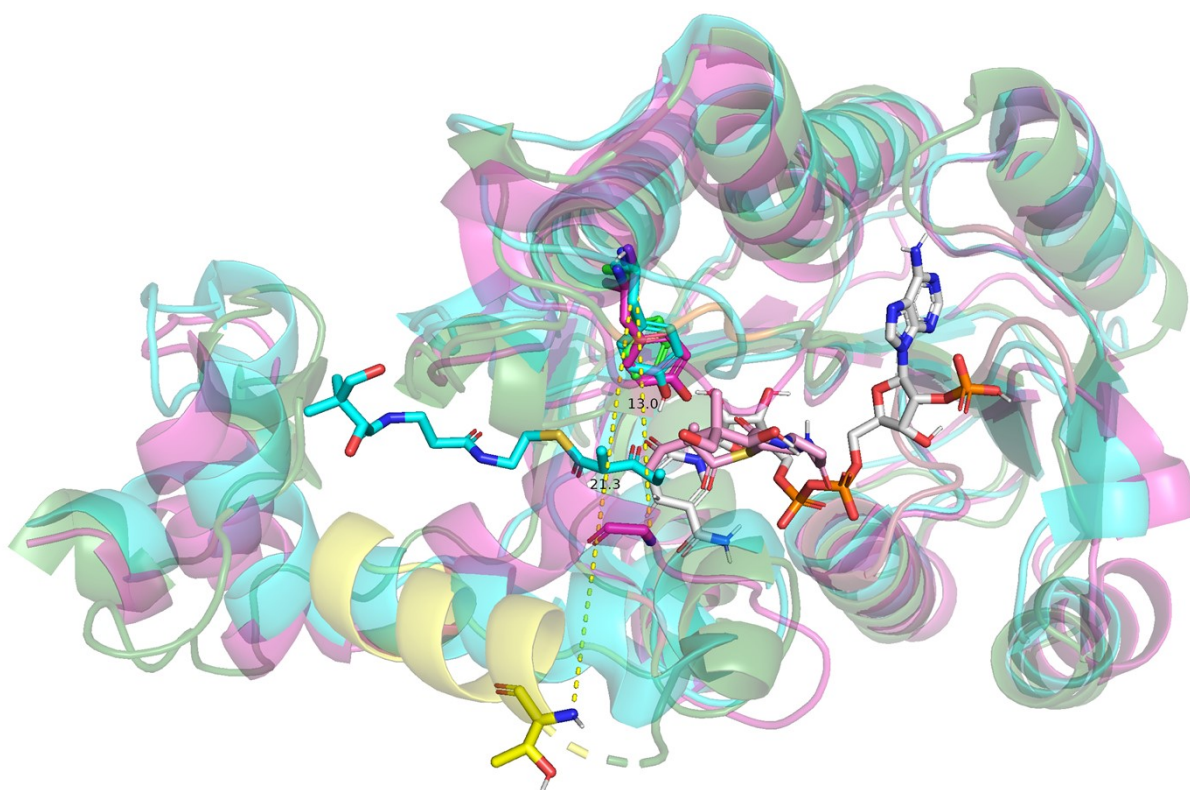

**Figure S4.** Overlay of TENS KR model (green-yellow), AmphB KR (cyan) and Tylosin KR1 (magenta) showing location of cofactor (grey), Amph B substrate (cyan) and TENS substrate (magenta). The substrate-binding helix (sbh) of the TENS KR is indicated in yellow and overlays well with the 'lid-helix' of the Amph B structure, but the lid-helix of the Tylosin structure approaches the bound substrates more closely. Distances calculated between amide nitrogen of N-terminal residues of the helices and the amide nitrogen of the active site tyrosine.

## 2.2 Spectroscopic Data for Identified Compounds

**Table S6** Overview of UV-, ES-, ES<sup>-</sup>-spectra for detected compounds.

| No  | Structure                                                                                                                                                                | UV spectrum                                                                         | ES <sup>-</sup>                                                                      | ES <sup>+</sup>                                                                       |
|-----|--------------------------------------------------------------------------------------------------------------------------------------------------------------------------|-------------------------------------------------------------------------------------|--------------------------------------------------------------------------------------|---------------------------------------------------------------------------------------|
| 1   | 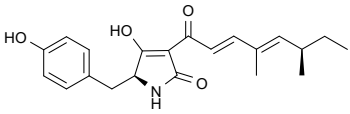 <p>pretenellin A<br/>Mass: 355.18</p>                                                  |    |    |    |
| 4/5 |  <p>prototenellin B<br/>Mass: 313.13</p> <p>prototenellin B isomer<br/>Mass: 313.13</p> |    |    |    |
| 6   |  <p>prototenellin A<br/>Mass: 353.16</p>                                                |    |    |    |
| 7   |  <p>pretenellin A isomer<br/>Mass: 355.18</p>                                         |  |   |   |
| 8   |  <p>anhydripretenellin A<br/>Mass: 353.16</p>                                         |  |  |  |
| 12  |  <p>desmethyl pretenellin A<br/>Mass: 341.16</p>                                      |  |  |  |
| 10  |  <p>hydroxy prebassianin A<br/>Mass: 397.19</p>                                       |  |  |  |
| 9   |  <p>prebassianin A<br/>Mass: 381.19</p>                                               |  |  |  |
| 11  |  <p>Mass: 395.21</p>                                                                  |  |  |  |

## 2.2.1 Detailed Analysis of Compound 10

Hexaketide products are produced as a mixture of methylation isomers (see X.-L. Yang, S. Friedrich, S. Yin, O. Piech, K. Williams, T. J. Simpson and R. J. Cox, *Chem. Sci.*, 2019, **10**, 8478–8489).<sup>4</sup> These are hydroxylated to produce a similar mixture of hexaketide alcohols so that the peak indicated as compound 10 actually consists of three isomers. LCMS analysis (below) supports this conclusion.

### Expansion of hexaketide alcohol peaks

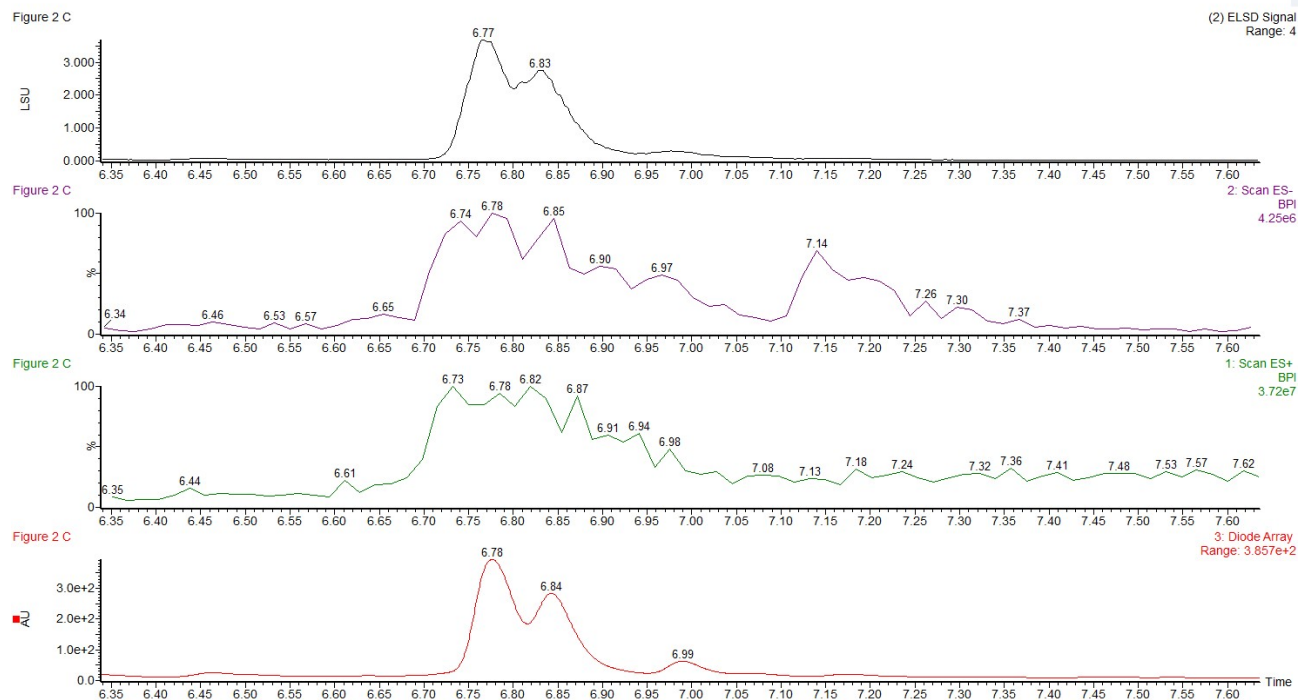

# 6.78 min peak

Figure 2 C 8133 (6.777)

3: Diode Array  
3.144

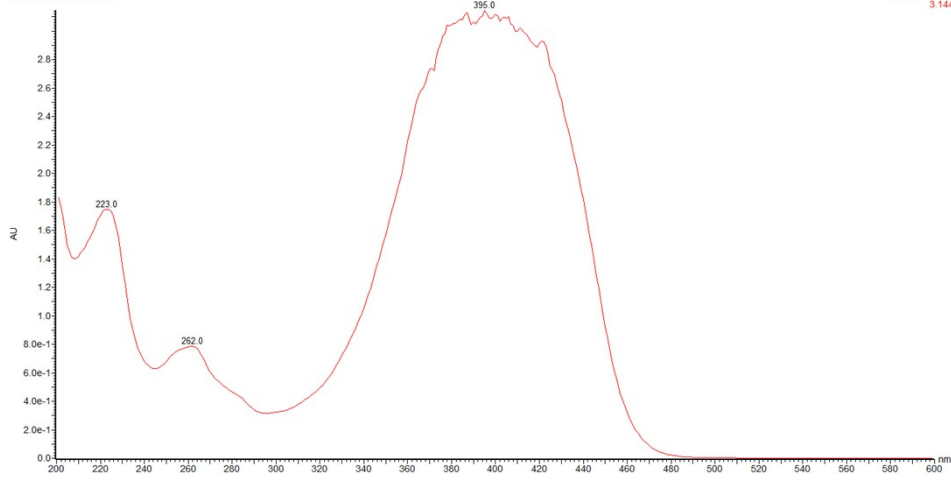

Figure 2 C 400 (6.935) Cm (399.400)

1: Scan ES+  
3.28e7

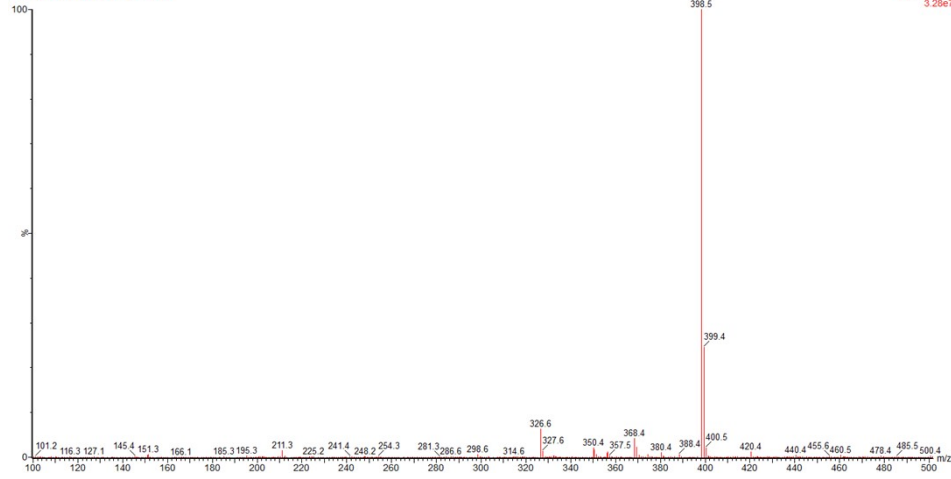

Figure 2 C 398 (6.909) Cm (398)

2: Scan ES-  
3.42e6

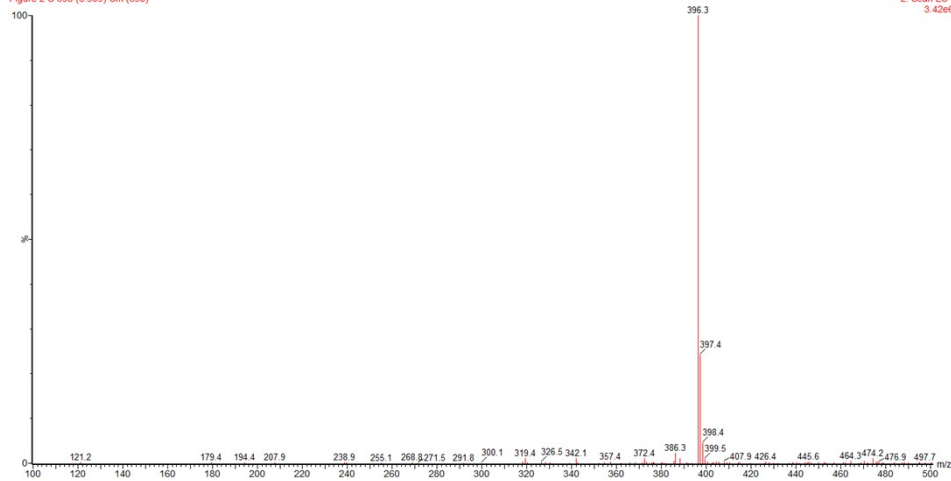

# 6.84 min peak

Figure 2 C 6214 (6.845)

3: Diode Array  
2.564

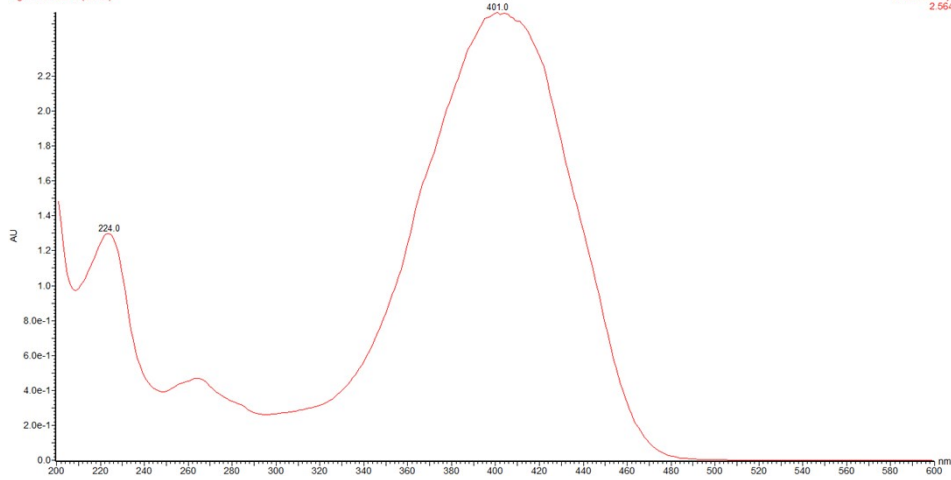

Figure 2 C 404 (7.004) Cm (404)

1: Scan ES+  
2.51e7

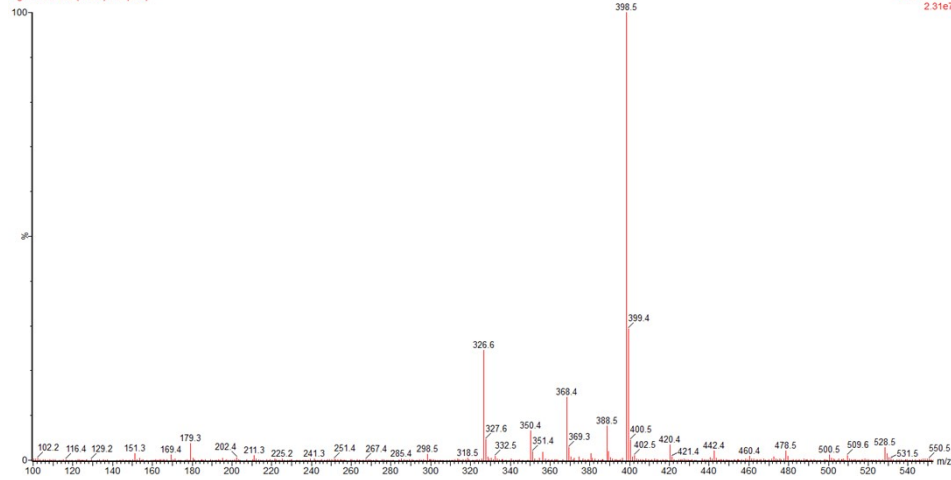

Figure 2 C 403 (6.995) Cm (402.403)

2: Scan ES-  
3.71e6

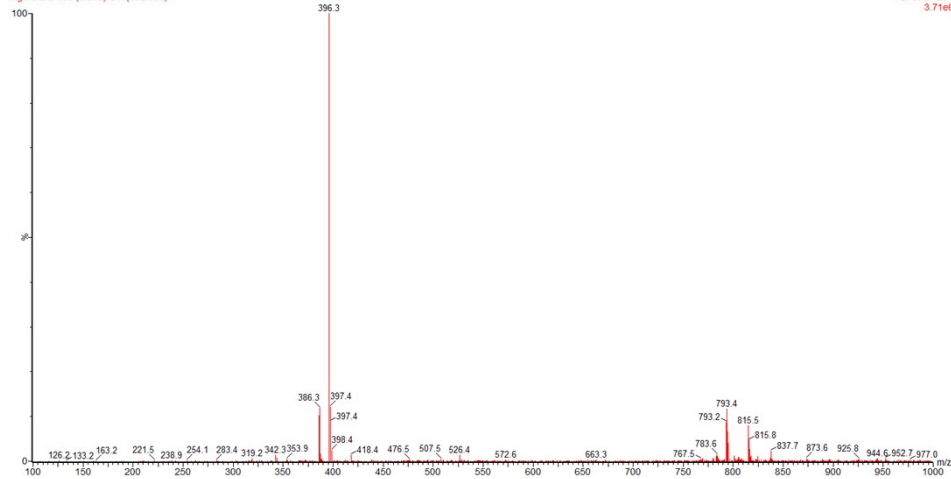

# 6.99 min peak

Figure 2 C 5388 (6.990)

3: Diode Array  
5.453e-1

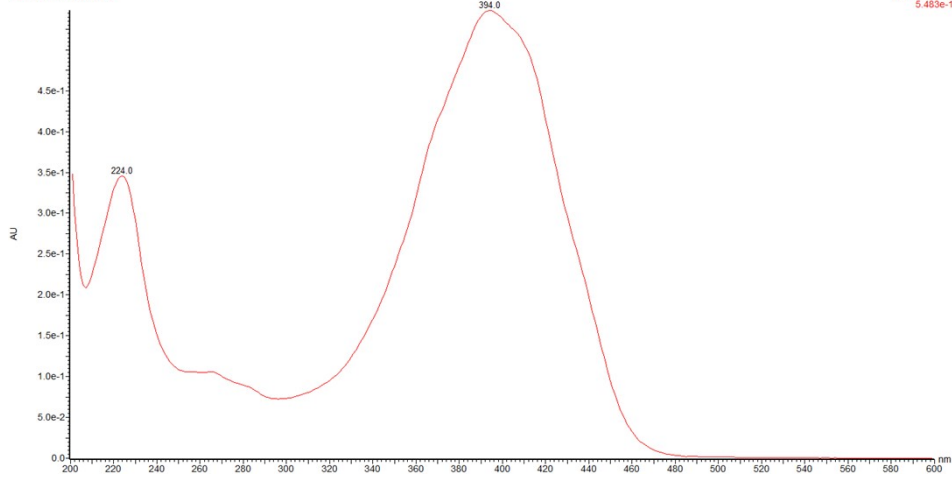

Figure 2 C 411 (7.126) Cm (410.412)

1: Scan ES+  
1.01e7

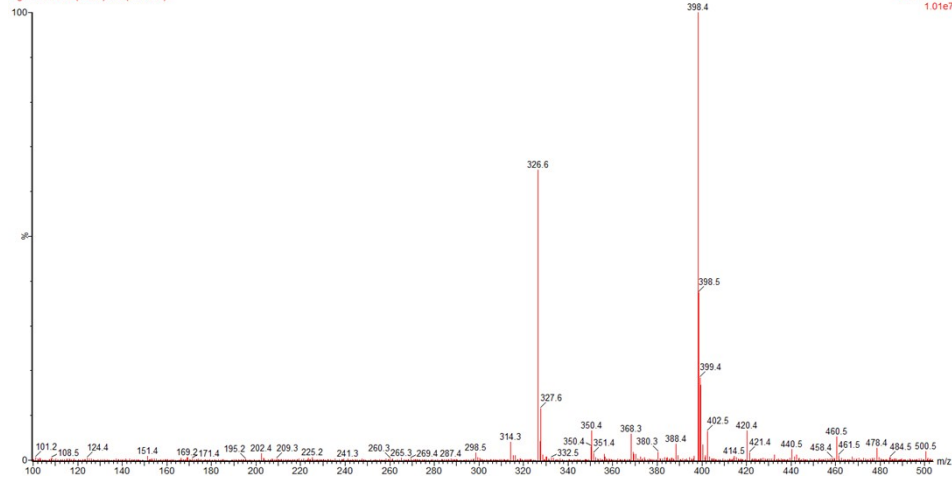

Figure 2 C 412 (7.152) Cm (412)

2: Scan ES-  
1.28e6

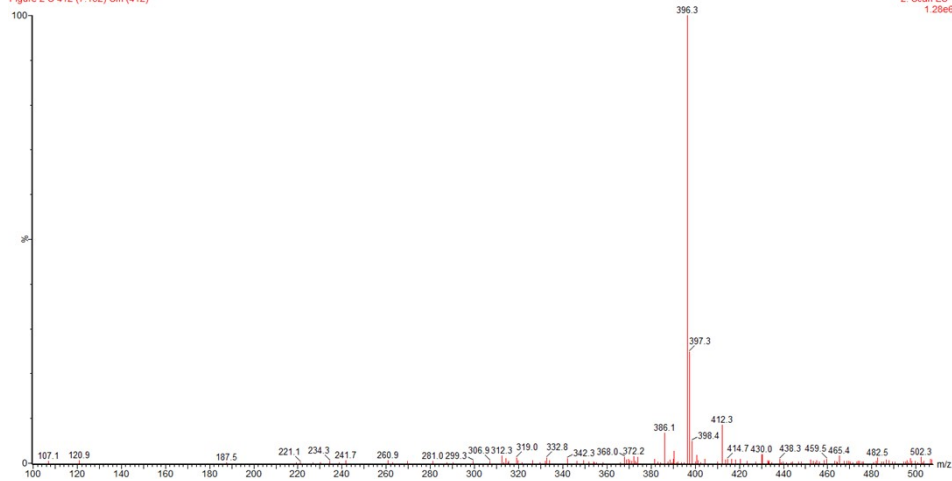

## 2.3 Overview of all Generated Transformants

**Table S7** Overview of all pretenellin A producing transformants.

| Experiment                     | Transformant | Detected compounds |    |   |   |             |    |    |
|--------------------------------|--------------|--------------------|----|---|---|-------------|----|----|
|                                |              | Pentaketides       |    |   |   | Hexaketides |    |    |
|                                |              | 6                  | 12 | 7 | 1 | 9           | 10 | 11 |
| substrate binding helix = DmbS | A            | X                  |    | X | X | X           | X  |    |
|                                | B            | X                  |    | X | X | X           | X  |    |
|                                | C            | X                  |    | X | X | X           | X  |    |
|                                | D            | X                  |    | X | X | X           | X  |    |
|                                | E            |                    |    | X | X | X           | X  |    |
|                                | F            | X                  |    | X | X | X           | X  |    |
|                                | G            | X                  |    | X | X | X           | X  |    |
|                                | H            | X                  |    | X | X | X           | X  |    |
|                                | I            | X                  |    | X | X | X           | X  |    |
| substrate binding helix = MiIS | A            | X                  |    | X | X | X           | X  | X  |
|                                | B            |                    |    |   | X | X           | X  |    |
|                                | C            |                    |    |   | X |             | X  |    |
|                                | D            |                    |    |   | X | X           | X  | X  |
| S2400N, L2401R, T2404M, V2406A | A            |                    |    | X | X | X           | X  |    |
|                                | B            |                    |    | X | X |             |    |    |
|                                | C            |                    |    | X | X |             |    |    |
|                                | D            | X                  |    | X | X | X           | X  |    |
|                                | E            | X                  |    | X | X | X           | X  |    |
| T2395A                         | A            | X                  |    | X | X |             |    |    |
|                                | B            | X                  |    | X | X |             |    |    |
|                                | C            | X                  |    | X | X |             |    |    |
|                                | D            | X                  | X  | X | X |             |    |    |
|                                | E            | X                  |    | X | X |             |    |    |
|                                | F            | X                  |    | X | X |             |    |    |
|                                | G            | X                  | X  | X | X |             |    |    |
| K2396A                         | A            | X                  | X  | X | X |             |    |    |
|                                | B            | X                  | X  | X | X |             |    |    |
|                                | C            | X                  |    | X | X |             |    |    |
|                                | D            | X                  | X  | X | X |             |    |    |
|                                | E            |                    |    | X | X |             |    |    |
| V2397A                         | A            | X                  |    |   | X |             |    |    |
|                                | B            |                    |    |   | X |             |    |    |
|                                | C            |                    |    |   | X |             |    |    |
| Q2398A                         | A            | X                  |    |   | X |             |    |    |
|                                | B            | X                  | X  |   | X |             |    |    |
|                                | C            | X                  |    |   | X |             |    |    |
|                                | D            | X                  |    | X | X |             |    |    |
| M2399A                         | A            | X                  |    | X | X |             |    |    |
| S2400A                         | A            | X                  |    | X | X |             |    |    |
|                                | B            | X                  |    | X | X |             |    |    |
|                                | C            | X                  | X  | X | X |             |    |    |
|                                | D            | X                  | X  | X | X |             |    |    |
|                                | E            | X                  | X  | X | X |             |    |    |
| L2401A                         | A            |                    | X  |   | X |             |    |    |
|                                | B            | X                  | X  |   | X |             |    |    |
|                                | C            |                    |    |   | X |             |    |    |

|        |   |   |   |   |   |   |   |   |
|--------|---|---|---|---|---|---|---|---|
| G2402A | A | X |   | X | X | X |   |   |
|        | B |   |   | X | X |   |   |   |
|        | C | X |   | X | X | X |   |   |
|        | D | X |   | X | X | X |   |   |
|        | E | X |   | X | X | X |   |   |
|        | F | X |   | X | X |   |   |   |
|        | G | X |   | X | X |   |   |   |
|        | H | X |   | X | X | X |   |   |
|        | I | X |   | X | X |   |   |   |
| T2403A | A | X | X | X | X |   |   |   |
|        | B | X | X | X | X |   |   |   |
|        | C | X | X | X | X |   |   |   |
|        | D | X | X | X | X |   |   |   |
|        | E | X | X | X | X |   |   |   |
|        | F | X | X | X | X |   |   |   |
|        | G | X | X | X | X |   |   |   |
|        | H | X | X | X | X |   |   |   |
| T2404A | A | X |   | X | X |   |   |   |
|        | B | X |   | X | X |   |   |   |
|        | C | X |   | X | X |   |   |   |
|        | D |   |   | X | X |   |   |   |
|        | E |   |   | X | X |   |   |   |
|        | F |   |   |   |   |   |   |   |
|        | G | X |   | X | X |   | X |   |
| R2405A | A |   | X | X | X |   |   |   |
|        | B | X | X | X | X |   |   |   |
|        | C | X | X | X | X |   |   |   |
| V2406  | A | X |   | X | X |   | X |   |
|        | B | X |   | X | X |   | X |   |
|        | C | X |   | X | X | X | X |   |
| M2407A | A |   |   | X | X |   |   |   |
|        | B |   |   | X | X |   |   |   |
|        | C |   |   | X | X |   |   |   |
|        | D | X |   | X | X |   |   |   |
|        | E | X | X | X | X | X |   | X |
| S2408A | A | X |   | X | X |   |   |   |
|        | B | X | X | X | X |   |   |   |
|        | C | X |   | X | X |   |   |   |
|        | D | X | X | X | X |   |   |   |
|        | E | X | X | X | X |   |   |   |
| V2409A | A | X | X | X | X |   |   |   |
|        | B | X | X | X | X |   |   |   |



### 3 Multiple Alignment

|          |        |                                                                                                                                                          |  |      |
|----------|--------|----------------------------------------------------------------------------------------------------------------------------------------------------------|--|------|
|          |        | 2201                                                                                                                                                     |  | 2250 |
|          |        | ER KR KR                                                                                                                                                 |  |      |
| TENS     | (2196) | PPLQTRGLFKSDRTYLMVGAAGGLGTSICRWMVRNGARHVVVTSRN--PK                                                                                                       |  |      |
| DMBS     | (2191) | PPLQTRGLFKSDRTYLMVGAAGGLGTSICRWMVRNGARHVVVTSRN--PK                                                                                                       |  |      |
| MILS     | (2196) | LFQSDRTYLMVGAAGGVGTSLCRWMVRHGARHVIVTSRN--PK                                                                                                              |  |      |
| AmphB    | (235)  | -----RPPVHGSVLVTGGTGGIGGRVARRLAEQGAHLVLTSTRGAD-                                                                                                          |  |      |
| mFAS pig | (1873) | LTGLSKTFCPPHKS <del>Y</del> VITGGLGGFGLQLAQMLRRLRGAQKLVLTSTRSGIRT                                                                                        |  |      |
| mFAS rat | (1867) | ISAI <del>S</del> KTFCPEHKS <del>Y</del> IITGGLGGFGLQLARMLVLRGAQRLVLTSTRSGIRT                                                                            |  |      |
|          |        | 2251                                                                                                                                                     |  | 2300 |
|          |        | KR KR                                                                                                                                                    |  |      |
| TENS     | (2244) | ADPEMLNEAERYGAAVQVVPMDACSKDSVQTVVDMIRATMPPIAGVCNAA                                                                                                       |  |      |
| DMBS     | (2239) | ADPEMLNEAERYGAI <del>V</del> RVVPMDACNKDSVQTVVDTIRATMPPIAGVCNAA                                                                                          |  |      |
| MILS     | (2237) | GDPTMLSEAKQYGATVRVVSMDVCDRRSVEAVVGMIRATMPPIAGVCNAA                                                                                                       |  |      |
| AmphB    | (279)  | GAAELRAELEQLGVRVTIAACDAADREALAALLAEL-PEDAPLTAVFHSA                                                                                                       |  |      |
| mFAS pig | (1923) | GYQARQVREWRROGVQV <del>L</del> VSTSNASSLDGARS <del>L</del> ITEATQIGVGGVFMLA                                                                              |  |      |
| mFAS rat | (1917) | GYQAKHVREWRROGIH <del>V</del> L <del>V</del> STSNVSSLEGARALIAEATKIGVGGVFMLA                                                                              |  |      |
|          |        | 2301                                                                                                                                                     |  | 2350 |
|          |        | KR KR                                                                                                                                                    |  |      |
| TENS     | (2294) | MVLRDKLFLDMNVDHMKDVLGPKMQGTEHLDSIFAQEP--LDFEVLLSSS                                                                                                       |  |      |
| DMBS     | (2289) | MVLCDKLFLDMDVDQMNNTLGPKVDGTEYLD <del>S</del> IFAHEP--LDFEILLGSA                                                                                          |  |      |
| MILS     | (2287) | MVLCDKLFLDMDVDILNNTLGPKVDGTEILDSIFSEEA--LDFEILLGST                                                                                                       |  |      |
| AmphB    | (328)  | GVAHDD-PVDLTLGQLDALMRAKLTAAARH <del>L</del> HELTADL--DLDAFVLFSSG                                                                                         |  |      |
| mFAS pig | (1973) | MVLRDAVLENQTP <del>E</del> FFQDVSKPKYS <del>T</del> ANL <del>R</del> V <del>T</del> REACPELDY <del>F</del> V <del>I</del> FS <del>V</del>                |  |      |
| mFAS rat | (1967) | MVLRDAMLENQTP <del>E</del> L <del>F</del> QDVN <del>K</del> PKY <del>N</del> FTLN <del>L</del> DRATREACPELDY <del>F</del> V <del>A</del> FS <del>V</del> |  |      |
|          |        | 2351                                                                                                                                                     |  | 2400 |
|          |        | KR KR                                                                                                                                                    |  |      |
| TENS     | (2342) | AAILNNTGQSNYHCANLYMDSLVTNR <del>R</del> SRGLAASIIHVGHVCDTGYVARL                                                                                          |  |      |
| DMBS     | (2337) | AAILN <del>N</del> MGQSNYHCANLYMDSL <del>V</del> KK <del>R</del> SRGLAASIIHIGHVCDTGYVARM                                                                 |  |      |
| MILS     | (2235) | ATIANNIGQSNYHCANLYMDSLVAQ <del>R</del> SRGLAASIIHIGYICDTGYVARL                                                                                           |  |      |
| AmphB    |        | AAVFGSGQPGYAAANAYLDALAEH <del>R</del> RS <del>L</del> GLTASSVAWG <del>T</del> WGEVGMATDP                                                                 |  |      |
| mFAS pig | (2023) | SCGRGNAGQ <del>S</del> NYGFAN <del>S</del> AMERICE <del>K</del> RRHD <del>G</del> L <del>P</del> GLAVQWCAIGV <del>V</del> V <del>L</del> ET              |  |      |
| mFAS rat | (2017) | SCGRGNAG <del>S</del> NYGFAN <del>S</del> MERICE <del>Q</del> RRHD <del>G</del> L <del>P</del> GLAVQWCAIGV <del>V</del> II <del>L</del> EA               |  |      |
|          |        | 2401                                                                                                                                                     |  | 2450 |
|          |        | KR KR                                                                                                                                                    |  |      |
| TENS     | (2392) | VDDTKVQMSLGTTRVMSVSETDVHHAFAEAVRGGQ <del>P</del> DSRSGSHNIIMGIE                                                                                          |  |      |
| DMBS     | (2387) | VDDNRIQSN <del>I</del> ATMRAMRLSETDVHHAFAQAVRGGQLDSRSGSYNIIMGIE                                                                                          |  |      |
| MILS     | (2385) | GDDAKVHSNRDVMRATTLSETDVHHAFAEAVRGGSPGSPIGSYNIIMGID                                                                                                       |  |      |
| AmphB    | (337)  | EVHDLRVRQGV <del>L</del> AMEPPEHALGALDQMLNDDTAAAPI <del>T</del> MDWEMFAPAF <del>T</del> N                                                                |  |      |
| mFAS pig | (2073) | MGTNDTVIGGTL <del>P</del> QRIAS <del>C</del> LEVL <del>D</del> FL <del>S</del> OPHPVLS-----                                                              |  |      |
| mFAS rat | (2067) | MGTNDTVVGGTL <del>P</del> QRISS <del>C</del> MEVL <del>D</del> FL <del>N</del> OPHAVLS-----                                                              |  |      |
|          |        | 2451                                                                                                                                                     |  | 2500 |
|          |        | KR KR                                                                                                                                                    |  |      |
| TENS     | (2442) | PPTKPLDLTKRKPVWISDPRLG <del>P</del> CLPFSTLENQMMASEQAAAASAV <del>D</del> SLA                                                                             |  |      |
| DMBS     | (2437) | PPTKPLDLTRRQAVWLSDPRLGHMLPYSTLENQMIASGQAAA-S-ADSLA                                                                                                       |  |      |
| MILS     | (2435) | PPTKSLDSSRRKALWLSDPRLGHMV <del>P</del> YSASADQAVTSEQA                                                                                                    |  |      |
| AmphB    | (478)  | RPSALLSTVPEAVSALSDE-----                                                                                                                                 |  |      |
| mFAS pig | (2108) | -----SFVLA <del>E</del> KKAAAPRDGSSQK-----                                                                                                               |  |      |
| mFAS rat | (2102) | -----SFV <del>L</del> VEKKA <del>V</del> AHG <del>D</del> GEAQR-----                                                                                     |  |      |

█: Identity within PKS-NRPS, █: Identity within mFAS, █: Identity between PKS-NRPS and mFAS

#### 4 References

- 1 R. D. Gietz and R. H. Schiestl, *Nat. Protoc.*, 2007, **2**, 35–37.
- 2 R. D. Gietz and R. A. Woods, *Methods Mol. Biol.*, 2006, **313**, 107–120.
- 3 F. Katzen, *Expert Opin. Drug Discov.*, 2007, **2**, 571–589.
- 4 X.-L. Yang, S. Friedrich, S. Yin, O. Piech, K. Williams, T. J. Simpson and R. J. Cox, *Chem. Sci.*, 2019, **10**, 8478–8489.
